# Supplementary material for: Insights into the Role of Substrates on the Interaction between Cytochrome b5 and Cytochrome P450 2B4 by NMR
Source: PubMed Central journal article supplement (PMC4330534; doi:10.1038/srep08392), 2015-02-17

## Supporting information

### Insights into the Role of Substrates on the Interaction between Cytochrome *b*<sub>5</sub> and Cytochrome P450 2B4 by NMR

Meng Zhang<sup>†1</sup>, Stéphanie V. Le Clair<sup>†1</sup>, Rui Huang<sup>†</sup>, Shivani Ahuja<sup>†</sup>, Sang-Choul Im<sup>‡</sup>, Lucy Waskell<sup>‡</sup> and Ayyalusamy Ramamoorthy<sup>†</sup>

<sup>†</sup>Department of Chemistry and Biophysics, University of Michigan, Ann Arbor, Michigan 48109-1055, USA

<sup>‡</sup>Department of Anesthesiology, University of Michigan, and VA Medical Center, Ann Arbor, Michigan 48105, USA

To whom the correspondence should be addressed: Ayyalusamy Ramamoorthy, Department of Chemistry and Biophysics, University of Michigan, Ann Arbor, Michigan 48109-1055, USA, Tel.: (734) 647-6572; Fax: (734) 764-3323; E-mail: [ramamoor@umich.edu](mailto:ramamoor@umich.edu)

## FIGURE LEGENDS

**FIGURE S1. The secondary structure of CYP2B4 is not affected upon the addition of NaCl.** Circular Dichroism spectra of CYP2B4, incorporated in 2% (w/v) DMPC/DHPC isotropic bicelles ( $q = 0.25$ ), collected before and during titration of NaCl.

**FIGURE S1. The overall structure of cyt  $b_5$  is not affected by the addition of NaCl.**  $^1\text{H}/^{15}\text{N}$ -SOFAST-HMQC spectra of  $^{15}\text{N}$ -cyt  $b_5$ , incorporated in DMPC/DHPC isotropic bicelles ( $q = 0.25$ ), collected at the indicated salt conditions.

**FIGURE S2. Addition of BHT affects neither intensities nor chemical shifts of cyt  $b_5$  backbone NH resonances.** The  $^1\text{H}/^{15}\text{N}$ -SOFAST-HMQC spectrum of  $^{15}\text{N}$ -cyt  $b_5$  in isotropic bicelles (maroon) and the spectrum obtained after addition of BHT in a 2:1 molar ratio of BHT to cyt  $b_5$  (coral) superimposed above it.

**FIGURE S1.**

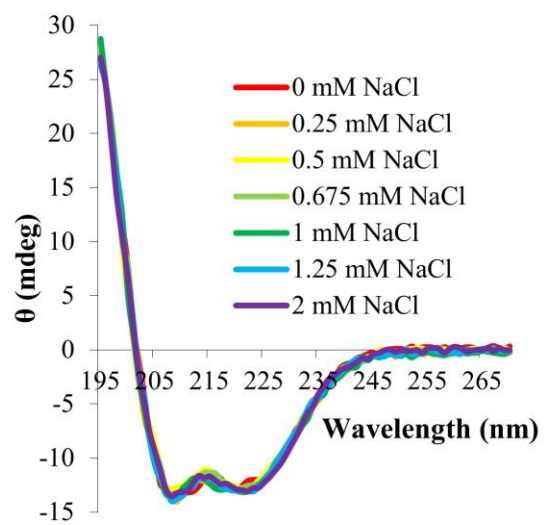

**FIGURE S2**

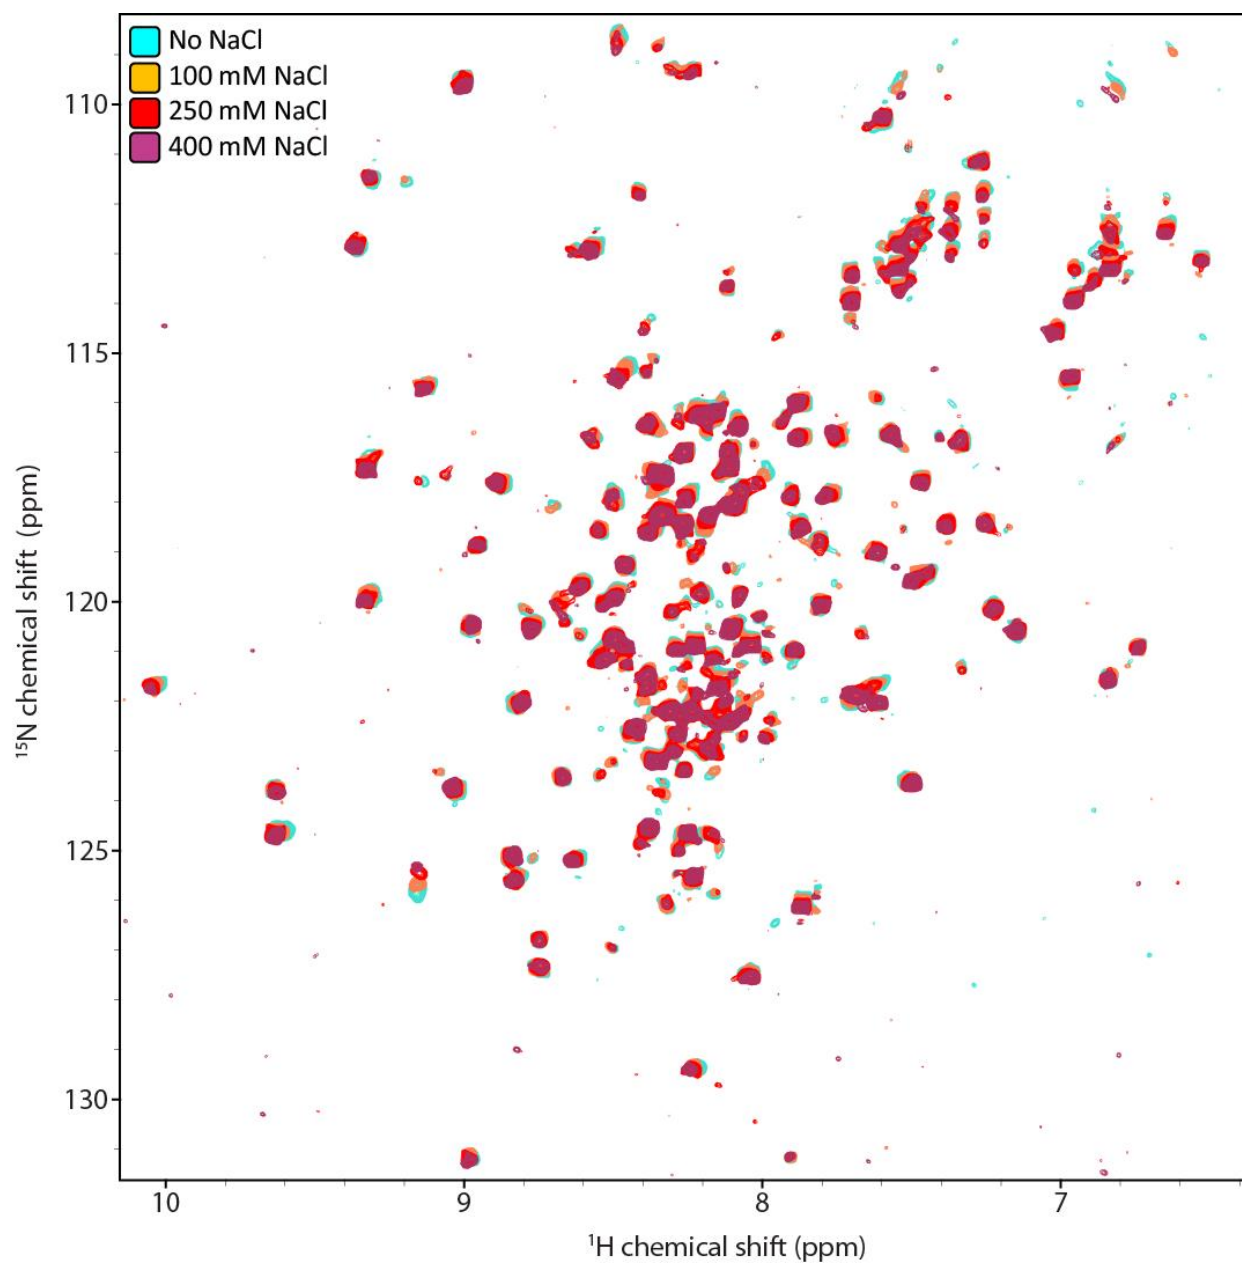

**FIGURE S3**

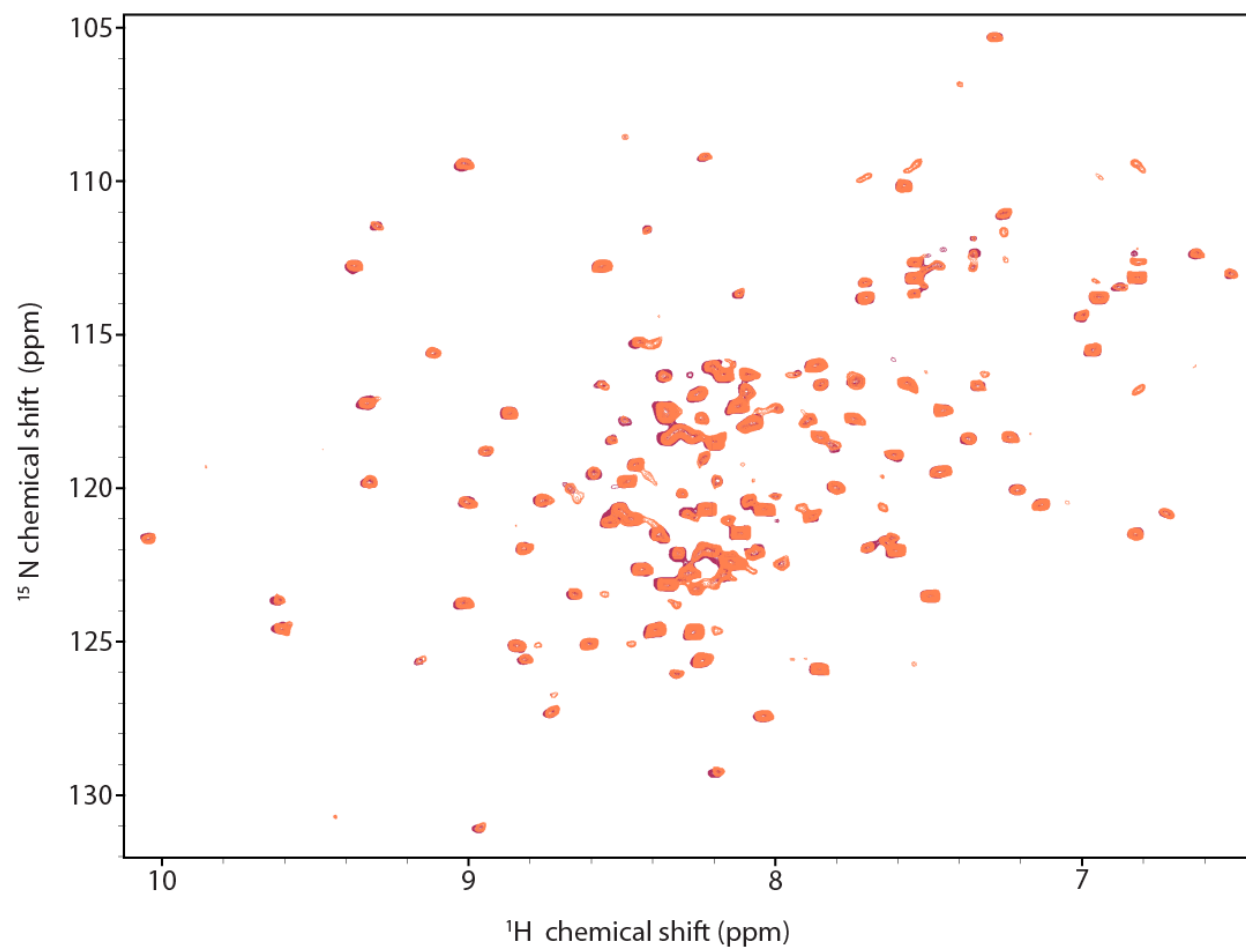

Supplement: srep08392-s1.pdf [file srep08392-s1.pdf]
